# Supplementary material
Source: PubMed Central journal article supplement (PMC4597281)

Supplementary Figure 1

Talati et al.

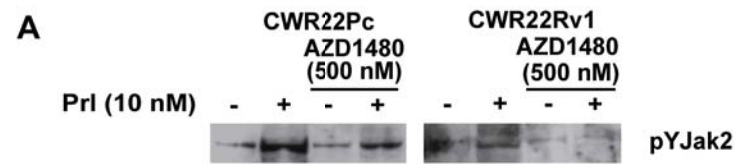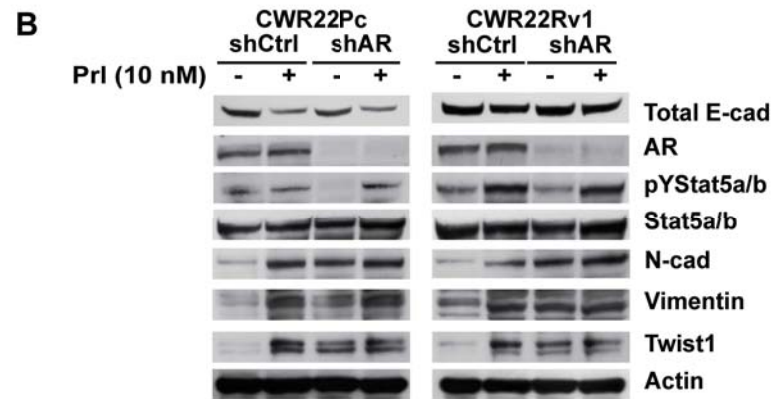

Supplement: mmc1.pdf [file mmc1.pdf]

Supplementary Figure 2

Talati et al.

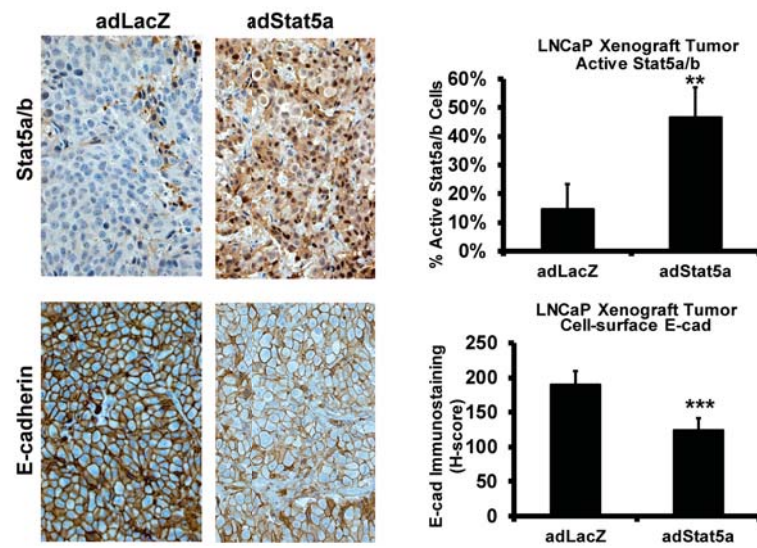

Supplement: mmc2.pdf [file mmc2.pdf]

Supplementary Figure 3

Talati et al.

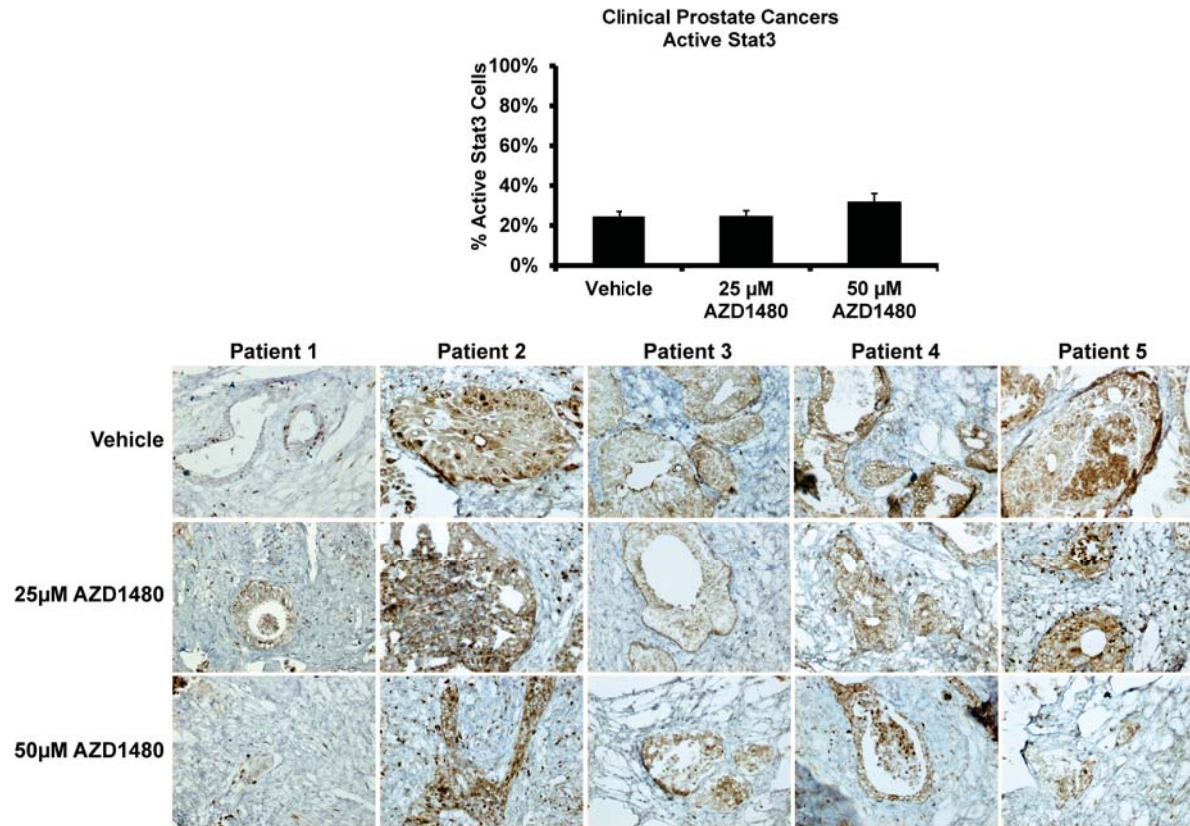

Supplement: mmc3.pdf [file mmc3.pdf]

Supplementary Figure 4

Talati et al.

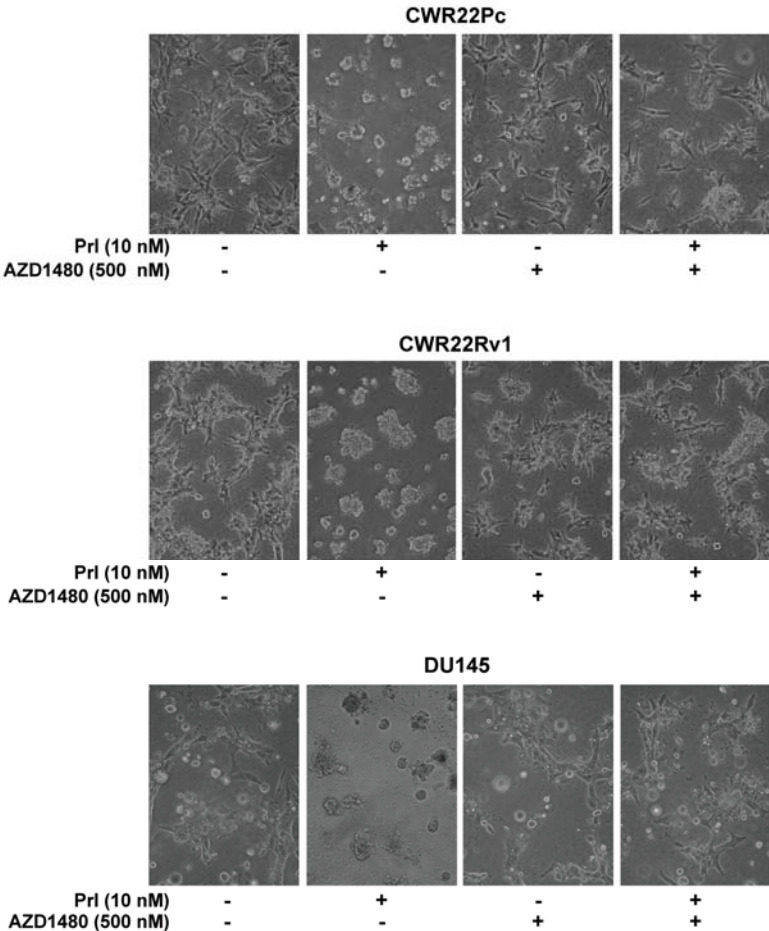

Supplement: mmc4.pdf [file mmc4.pdf]

Supplementary Figure 5

Talati et al.

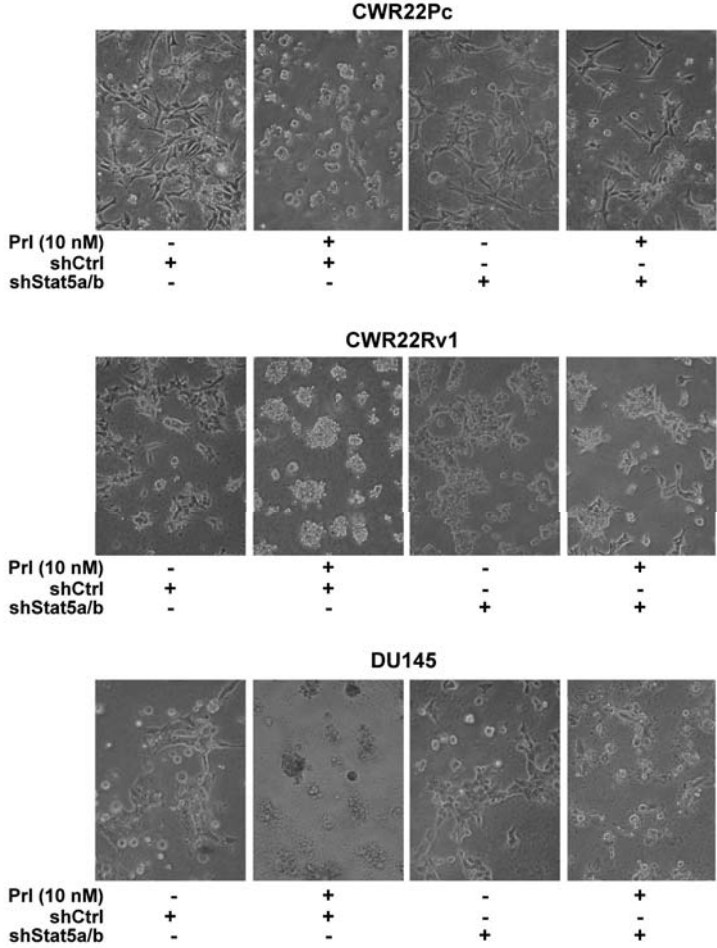

Supplement: mmc5.pdf [file mmc5.pdf]

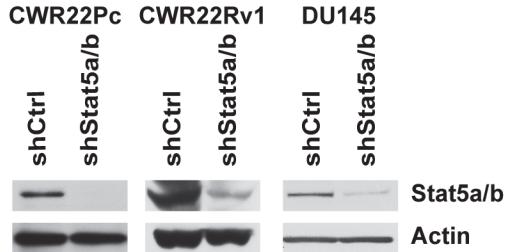

Supplement: mmc6.pdf [file mmc6.pdf]
